# Supplementary material for: The influences of AlGaN barrier epitaxy in multiple quantum wells on the optoelectrical properties of AlGaN-based deep ultra-violet light-emitting diodes
Source: Royal Society of Chemistry journal article supplement (doi:10.1039/d2ra07368d), 2023-01-01
Supplement: d2ra07368d1.pdf [file d2ra07368d1.pdf]

## Supporting information

# The Influences of AlGa<sub>N</sub> barrier epitaxy in multiple quantum wells on the optoelectrical properties of AlGa<sub>N</sub>-based deep ultra-violet light-emitting diodes

Tien-Yu Wang<sup>1</sup>, Wei-Chih Lai<sup>\*1,2</sup>, Qiao-Ju Xie<sup>1</sup>, Shun-Hao Yang<sup>1</sup>, Sheng-Po Chang<sup>1,2,3</sup>, Cheng-Huang Kuo<sup>4</sup>, and Jinn-Kong Sheu<sup>1,2</sup>

<sup>1</sup>Department of Photonics, National Cheng Kung University, Tainan 70101, Taiwan

<sup>2</sup>Advanced Optoelectronic Technology Center, Research Center for Energy Technology and Strategy, National Cheng Kung University, Tainan 70101, Taiwan

<sup>3</sup>Institute of Microelectronics and Department of Electrical Engineering, National Cheng Kung University, Tainan 70101, Taiwan

<sup>4</sup>Institute of Lighting and Energy Photonics, College of Photonics, National Yang Ming Chiao Tung University, Tainan 71150, Taiwan

\*weilai@ncku.edu.tw

(a)

|                                         |         |
|-----------------------------------------|---------|
| p-GaN                                   | 10 nm   |
| p-AlGaN (graded Al)                     | 20 nm   |
| p-AlGaN superlattice                    | 20 nm   |
| EBL                                     | 40 nm   |
| MQWs                                    | 5 pairs |
| n-Al <sub>0.6</sub> Ga <sub>0.4</sub> N | 1.5 μm  |
| Transition layers                       | 0.6 μm  |
| AlN                                     | 3 μm    |
| Sapphire                                |         |

(b)

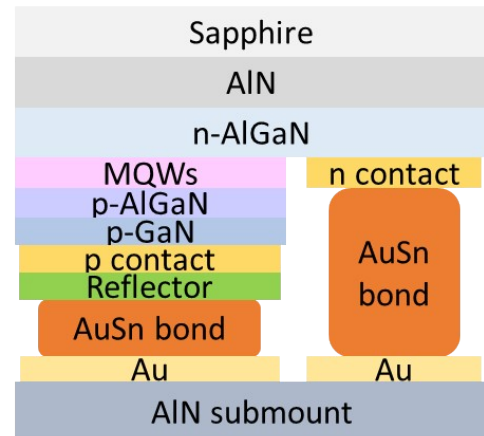

**Fig. S1** (a) The epitaxial structure of the AlGaN-based DUV LEDs. (b) The schematic of the fabricated flip-chip DUV LED.

The polarization-dependent EL spectra were measured for the DUV LEDs varying the AlGaN barrier growth rate. With lowering the AlGaN barrier growth rate, the TE-polarized EL intensity increased. Accordingly, the DOP in the DUV LEDs increased as the AlGaN barrier growth rate was reduced.

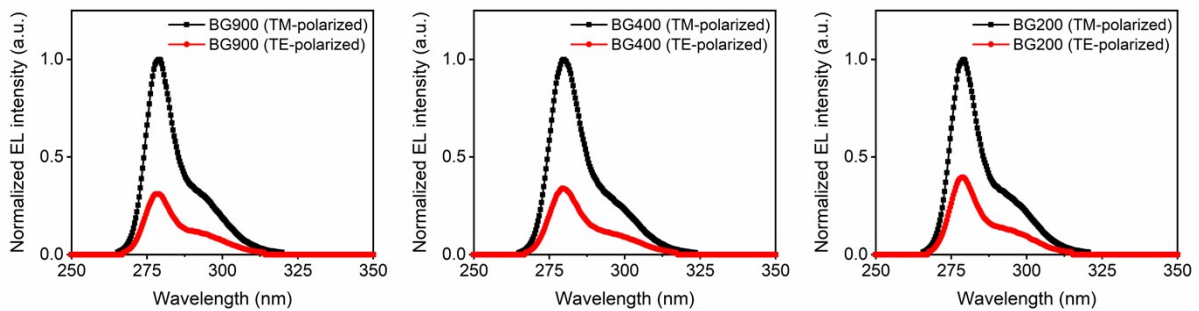

**Fig. S2** Polarization-dependent EL spectra of the DUV LEDs varying AlGaN barrier growth rate.

|                                                  |                   |
|--------------------------------------------------|-------------------|
| $\text{Al}_{0.7}\text{Ga}_{0.3}\text{N}$ barrier | 400 nm            |
| n- $\text{Al}_{0.6}\text{Ga}_{0.4}\text{N}$      | 1.5 $\mu\text{m}$ |
| Transition layers                                | 0.6 $\mu\text{m}$ |
| AlN                                              | 3 $\mu\text{m}$   |
| Sapphire                                         |                   |

**Fig. S3** The epitaxial structure of the AlGa<sub>N</sub> barrier layer for the measurement of AlN (104) X-ray diffraction reciprocal space mapping.
